# Supplementary material for: CARD-FISH in the Sequencing Era: Opening a New Universe of Protistan Ecology
Source: Front Microbiol. 2021 Mar 4;12:640066. doi: 10.3389/fmicb.2021.640066 (PMC7970053; doi:10.3389/fmicb.2021.640066)
Supplement: Supplementary Table 1 — List of FISH and CARD-FISH probes developed for protistan lineages, hybridization conditions, their current coverage and specificity, and overall recommendation for usage. The overall rating of probes is based on coverage of the target group and number of non-target hits in the guide tree of SILVA database RefNR 138.1 (very good: >80 coverage, no/almost no non-target hits; good: >50% coverage, almost no non-target hits; bad: <50 coverage and/or high number of non-target hits). Taxonomy is based on SILVA classification 138.1. List of references is available as Supplementary File 6. If two references to one probe are given, the first corresponds to the work that developed the probe, and the second to the work that tested it for FISH/CARD-FISH application. [file Table_1.XLSX]

## Sheet: Table S1
Table S1: Published FISH/CARD-FISH probes for protistan lineages. The overall rating of probes is based on coverage of the target group and number of non-target hits in the guide tree of SILVA database RefNR 138.1 (very good: >80 coverage, no/almost no non-target hits; good: >50% coverage, almost no non-target hits; bad: <50 coverage and/or high number of non-target hits). Taxonomy is based on SI…
No.	Probe name	Target group in original publication	Full taxonomy of target group	Sequence (5'-3')	% of formamide (hybridzation temp.)	Reference	Overall rating	% coverage	# target group	# total hits	# target hits	# non-target hits	% non-target hits	Non-target taxonomy	Comments
General probes
1	EUK1209R (EUK1195)	Eukaryotes	Eukaryota	GGGCATCACAGACCTG	30-40% (35°C or 46°C)	1	very good	87.6	56790	49732	49729	3	0	2 Bacteria/Cyanobacteria/Cyanobacteriia/Chloroplast, 1 Archaea/Crenarchaeota/Nitrososphaeria/Nitrososphaerales/Nitrososphaeraceae/Candidatus Nitrososphaera	recommended general probe
2	EUK516	Eukaryotes	Eukaryota	ACCAGACTTGCCCTCC	20% (35°C)	2	very good	83.4	56790	47777	47385	392	0.8	391 Archaea, 1 Bacteria/Cyanobacteria/Cyanobacteriia/Chloroplast,
3	EUK309	Eukaryotes	Eukaryota	TCAGGCTCCCTCTCCGG	0% (40°C)	3	good	71.4	56790	40543	40543	0	0
4	Non_Bal	None (negative control)	no Eukaryota	CAAGGTATTAACCCGTGGGATT	0% (35°C)	4	very good	0	56790	0	0
5	CON1	None (control probe)	no Eukaryota	GAGCCTGAGAAACGGC	0% (45°C)	5	very good	0	56790	9	0
6	CON2	None (control probe)	no Eukaryota	GTAATTCCAGCTCCAAT	0% (45°C)	5	very good	0	56790	9	0
7	CON3	None (control probe)	no Eukaryota	CTGCCCTTTGTACACAC	0% (45°C)	6	very good	0	56790	9	1
8	KIN 516	Kinetoplastids	Eukaryota/Discoba/Discicristata/Euglenozoa/Kinetoplastea	ACCAGACTTGTCCTCC	55%/40% (35°C)	7	good	94.8	516	837	489	321	38.4	1 Archaea, 206 Eukaryota/Obazoa/Opistokonta, 44 Eukaryota/Amoebozoa, 8 Archaeplastida/Chloroplastida, 3 Eukaryota/Amorphae/Amoebozoa, 1 Eukaryota/SAR/Stramenopiles, 20 SAR_Rhizaria_1, 5 Eukaryota/SAR/Alveolata, 38 Eukaryota/SAR/Alveolata/Ciliphora/Intramacronucleata, 2 Eukaryota/SAR/Alveolata/Ciliphora/Intramacronucleata/Armophorea, 4 Eukaryota/SAR/Alveolata/Ciliophora,3 Eukaryota/SAR/Alveolata/C…	Probe has many non-target hits, however, experienced scientists can discriminate these in the microscope due to the presence of a kinetoplast
	EUK516 Comp.	Competitor probe for KIN516	no Eukaryota/Discoba/Discicristata/Euglenozoa/Kinetoplastea	ACCAGACTTGCCCTCC	55%/40% (35°C)	7	very good	0	516	47818	0
9	14F	Kinetoplastids	Eukaryota/Discoba/Discicristata/Euglenozoa/Kinetoplastea	CUGCCAGUAGUCAUAUAUGCUUGUUUCAAGGA	20% (46°C)	8	bad	0.4	516	2	2	0	0		Very low coverage for a general probe
10	Rev 14F	None (negative control)	no Eukaryota/Discoba/Discicristata/Euglenozoa/Kinetoplastea	UCCUUGAAACAAGCAUAUAUGACUACUGGCAG	20% (46°C)	8	bad	0.2	516	1	1				Negative control targets 1 sequences of the target group
11	Diplo516	Diplonemids	Eukaryota/Discoba/Discicristata/Euglenozoa/Diplonemea	ACCAGACTTGTCCACC	40% (35°C)	9	very good	82.6	155	132	128	4	3	3 Archaea/Crenarchaeota/Nitrososphaeria/Nitrosotaleales/Nitrosotaleaceae/Candidatus Nitrosotalea, 1 Eukaryota/SAR/Rhizaria/Retaria/Polycystinea/Spumellaria/uncultured
12	DiploR1792	Diplonemids	Eukaryota/Discoba/Discicristata/Euglenozoa/Diplonemea	GCATTCCTCATTCAAGGA	30% (35°C)	10	good	74.2	155	119	115	4	3.4	2 Eukaryota/Discoba/Discicristata/Euglenozoa, 1 Eukaryota/Discoba/Discicristata/Euglenozoa/Kinetoplastea/Incertae Sedis Hemistasia, 1 Eukaryota/SAR/Rhizaria/Retaria/Polycystinea/Spumellaria/uncultured
13	PRYM02	Haptophyta	Eukaryota/Haptophyta	GGAATACGAGTGCCCCTGAC	40% (35°C)	11	very good	88.6	228	202	202	0	0
14	PRYM01	Prymnesiophyceae	Eukaryota/Haptophyta	TCGTAAACGGTCCCTACA	10% (46°C)	12	good	96.4	228	275	216	59	21.5	2 Bacteria/Proteobacteria/Alphaproteobacteria/Rickettsiales/Mitochondria, 3 Eukaryota/Amorphea/Obazoa/Opisthokonta/Holozoa/Choanozoa/Metazoa, 2 Eukaryota/Amorphea/Obazoa/Opisthokonta/Holozoa/Choanozoa/Choanoflagellata, 14 Eukaryota/Amorphea/Obazoa/Opisthokonta/Nucletmycea, 3 Eukaryota/Archaeplastida/Chloroplastida/Chlorophyta, 6 Eukaryota/Archaeplastida/Chloroplastida/Charophyta/Phragmoplastophyt…	High number of non-target hits, however, most of these are clearly distinuishable (e.g. fungi, choanoflagellates, dinoflagellates, ciliates)
15	S-C-DINO-1404	Dinoflagellates	Eukaryota/SAR/Alveolata/Dinoflagellata & uncultured lineages related to these	CCTCAAACTTCCTTGCRTTA	20% (55°C)	13	bad	71.1	1930	2005	1373	632	31.5	8 Eukaryota/Amorphea/Obazoa/Opisthokonta/Holozoa/Choanozoa, 4 Eukaryota/Amorphea/Obazoa/Opisthokonta/Nucletmycea/Fungi, 6 Eukaryota/Archaeplastida/Chloroplastida, 3 Eukaryota/Cryptophyceae/Kathablepharidae, 2 Eukaryota/Discoba/Jakobida, 1 Eukaryota/Picozoa, 1 Eukaryota/SAR/Alveolata, 386 Eukaryota/SAR/Alveolata/Apicomplexa , 8 Eukaryota/SAR/Alveolata/Ciliophora, 192 Eukaryota/SAR/Alveolata/Protal…	Dinoflagellates are not a monophyletic group in Alveolata, all lineages that were named Dinoflaellata and closely related uncultured lineages were used for testing the specificity of the probe. Probe has too many non-target hits
16	SYN-I-1161	Syndiniales group I	Eukaryota/SAR/Alveolata/Protalveolata/Syndiniales/Syndiniales Group I	TCCTCGCGTTAGACACGC	20% (46°C)	14	bad	76	358	342	272	70	20.5	1 Eukaryota/Picozoa, 1 Eukaryota/Amorphea/Obazoa/Opistokonta/Holozoa/Choanozoa/Metazoa/Animalia, 9 Eukaryota/SAR/Alveolata/Apicomplexa/Conoidasida, 1 Eukaryota/SAR/Alveolata/Ciliophora/Intramacronucleata/Conthreep/Nassophorea/uncultured, 33 Eukaryota/SAR/Alveolata/Dinoflagellata, 1 Eukaryota/SAR/Alveolata/Protalveolata/Chromerida/Chromera, 1 Eukaryota/SAR/Alveolata/Protalveolata/Syndiniales/Amoeb…	High number of non-target hits, also closely related sequences that are not easily distinguishable
17	SYN-II-675	Syndiniales group II	Eukaryota/SAR/Alveolata/Protalveolata/Syndiniales/Syndiniales Group II	CACCTCTGACGCGTTAAT	20% (46°C)	14	good	50.7	1745	891	884	7	0.8	3 Eukaryota/SAR/Alveolata/Protalveolata/Syndiniales/Syndiniales Group I, 1 Eukaryota/Amorphea/Obazoa/Opisthokonta/Holozoa/Choanozoa/Metazoa/Animalia, 1 Eukaryota/Discoba/Jakobida/uncultured, 1 Eukaryota/SAR/Alveolata/Dinoflagellata/Dinophyceae/Gymnodiniphycidae/Incertae Sedis/Cochlodinium, 1 Eukaryota/SAR/Stramenopiles/MAST-1	Syndiniales group II is polyphyletic with many lineages, a monophyletic higher-class level including Amoebophyra and several uncultured clades was used for probe check
18	Alv01	Alveolates, group II	Eukaryota/SAR/Alveolata/Protalveolata/Syndiniales/Syndiniales Group II	GCCTGCCGTGAACACTCT	40% (42°C)	15	good	59.7	1763	1076	1053	23	2.1	2 Eukaryota/Amorphea/Obazoa/Opisthokonta/Holozoa/Choanozoa/Metazoa/Animalia, 2 Eukaryota/Discoba/Jakobida, 1 Eukaryota/Incertae Sedis Telonema, 1 Eukaryota/SAR/Alveolata/Ciliophora, 4 Eukaryota/SAR/Alveolata/Dinoflagellata, 1 Eukaryota/SAR/Alveolata/uncultured,3 Eukaryota/SAR/Rhizaria/Retaria, 1 Eukaryotes/SAR/Stramenopiles/MAST-12, 1 Eukaryotes/SAR/Stramenopiles/MAST-4	This probe has the same targets as probe SYN-II-675 plus some additional lineages.
19	CERC_02	Cercozoa	Eukaryota/SAR/Rhizaria_1/Cercozoa_1	AATACGAGCACCCCCAAC	40% (35°C)	16	bad	7.9	1323	105	105	0	0		Low coverage for a general probe
20	LabY1336	Labyrinthulomycetes	Eukaryota/SAR/Stramenopiles/Labyrinthulomycetes	AACCCGAAATGTCCCTCTAAGAAG	40% (35°C)	17	bad	12.2	392	51	48	3	5.9	1 Eukaryota/SAR/Stramenopiles/MAST-3, 1 Eukaryota/SAR/Rhizaria/Cercozoa_1, 1 Eukaryota/SAR/Alveolata/Protalveolata/Syndiniales,	Low coverage for a general probe
21	CHLO02	Chlorophyta	Eukaryota/Archaeplastida/Chloroplastida/Chlorophyta	CTTCGAGCCCCCAACTTT	40% (35°C)	18	bad	83	1874	5844	1555	4289	73.4	17 Eukaryota/Obazoa/Opistokonta, 4256 Eukaryota/Archaeplastida/Chloroplastida/Charophyta, 1 Eukaryota/Archaeplastida/Rhodophyceae/Rhodellophyceae, 2 Eukaryota/SAR/Stramenopiles, 9 Eukaryota/SAR/Alveolata, 2 Eukaryota/SAR/Alveolata/Chiliophora/Intramacronucleata, 1 Eukaryota/SAR/Alveolata/Ciliophora, 1 unclassified	Too many non-target hits
22	CHLO01	Most Chlorophyta/some non Chlorophyta	Eukaryota/Archaeplastida/Chloroplastida/Chlorophyta	GCTCCACGCCTGGTGGTG	25% (46°C)	18	bad	80.2	1874	5615	1503	4112	73.2	5 Archaea, 1739 Amorphea, 33 Haptophyta, 455 Eukaryota/Archaeplastida/Chloroplastida/Charophyta, 83 Cryptophyceae, 5 Archaeplastida, 21 SAR/Stramenopiles, 132 SAR/Rhizaria, 1443 SAR/Alveolata, 191 SAR, 1 Discoba/Jakobida, 4 Incertae Sedis Telonema	Too many non-target hits
23	NCHLO01	Non Chlorophyceae	no Eukaryota/Archaeplastida/Chloroplastida/Chlorophyta	GCTCCACTCCTGGTGGTG	25% (46°C)	12	bad	0.8	751	37583	6		0		NON-probe targets some Chlorophyceae
24	CRYPT 13	Cryptophyceae	Eukaryota/Cryptophyceae_1	CGAAATATAAACGGCCCCAAC	40% (35°C)	19	bad	38.8	170	66	66		0
25	Crypto B	Cryptophyceae	Eukayota/Cryptophyceae_1 and Eukaryota/SA1-3C06	ACGGCCCCAACTGTCCCT	50% (46°C)	20, 21	good	74.1	174	129	129	1	0.8	1 Eukaryota/SAR/Alveolata/Dinoflagellata/Dinophyceae/Peridiniphycidae/Gonyaulacales/Ceratium	Eukaryota/SA1-3C06 is included in Cryptophyceae in a ML tree
26	CHRYSO_01	Chrysophyceae	Eukaryota/SAR/Stramenopiles/Ochrophyta/Chrysophyceae/	TTTCGGACAAGGAAGACTCG	40% (35°C)	16	bad	25.7	487	128	125	3	2.3	1 Eukaryota/Archaeplastida/Chloroplastida/Charophyta/Phragmoplastophyta/Streptophyta/Embryophyta/Tracheophyta/Spermatophyta/Magnoliophyta, 1 Eukaryota/SAR/Alveolata/Protalveolata/Syndiniales/Syndiniales Group I, 1 Eukaryota/SAR/Stramenopiles/Ochrophyta/Diatomea/Bacillariophytina/Bacillariophyceae/Rhaphoneis	Low coverage of target group
Specific probes
27	PRAS01	Pseudoscourfieldiales clade V	Eukaryota/Archaeplastida/Chloroplastida/Chlorophyta/Prasinophytae/Pseudoscourfieldiales/Pycnococcus	ACGGTCCCGAAGGGTTGG	40% (35°C)	22	very good	100	2	2	2	0	0
28	PRAS03	Prasinococcales	Eukaryota/Archaeplastida/Chloroplastida/Chlorophyta/Prasinophytae/Prasinococcales/Prasinococcus	GCCACCAGTGCACACCGG	40% (35°C)	22	good	61.5	13	8	8	0	0
29	PRAS04	Mamiellales (except the genus Dolichomatix)	Eukaryota/Archaeplastida/Chloroplastida/Chlorophyta/Mamiellophyceae	CGTAAGCCCGCTTTGAAC	40% (35°C)	22	very good	88.1	143	129	126	3	2.3	3 Eukaryota/SAR/Alveolata/Dinoflagellata/Dinophyceae/Gymnodiniphycidae/Kareniaceae/Karlodinium	Probe also targets 1 Dolichomastix sequence in SILVA 138.1 although designed ro not target those.
30	PRAS05	Prasinophyceae clade VIIA, RCC 287, CCMP 1205	Eukaryota/Archaeplastida/Chloroplastida/Chlorophyta/Clade VII/Subclade A	GCCAGAACCACGTCCTCG	40% (35°C)	22	bad	42.3	26	13	11	2	15.4	2 Eukaryota/Archaeplastida/Chloroplastida/Chlorophyta/Nephroselmidophyceae/Nephroselmidales/Nephroselmis	Low coverage of target group
31	PRAS06	Prasinophyceae clade VIIB	Eukaryota/Archaeplastida/Chloroplastida/Chlorophyta/Clade VII/Subclade B	AATCAAGACGGAGCGCGT	40% (35°C)	22	bad	25	12	3	3	0	0		Low coverage of target group
32	BATHY01	Bathycoccus	Eukaryota/Archaeplastida/Chloroplastida/Chlorophyta/Mamiellophyceae/Mamiellales/Bathycoccus	ACTCCATGTCTCAGCGTT	40% (35°C)	22	bad	68	25	20	17	3	15	1 Eukaryota/Archaeplastida/Chloroplastida/Chlorophyta/Mamiellophyceae/Mamiellales/Micromonas, 1 Eukaryota/Archaeplastida/Chloroplastida/Chlorophyta/Mamiellophyceae/Mamiellales/Ostreococcus, 1 Eukaryota/Archaeplastida/Chloroplastida/Chlorophyta/Mamiellophyceae	Non-target hits are closely related taxa that might be hard to distinguish
33	MICRO01	Micromonas	Eukaryota/Archaeplastida/Chloroplastida/Chlorophyta/Mamiellophyceae/Mamiellales/Micromonas	AATGGAACACCGCCGGCG	40% (35°C)	22	bad	34.4	64	22	22	0	0		The probe was initially designed to target only a few sequences, but has now a low coverage
34	OSTREO01	Ostreococcus	Eukaryota/Archaeplastida/Chloroplastida/Chlorophyta/Mamiellophyceae/Mamiellales/Ostreococcus	CCTCCTCACCAGGAAGCU	40% (35°C)	22	bad	66.7	18	16	12	4	25	3 Eukaryota/Archaeplastida/Chloroplastida/Chlorophyta/Mamiellophyceae/Mamiellales/Bathycoccus, 1 Eukaryota/Archaeplastida/Chloroplastida/Chlorophyta/Mamiellophyceae	Non-target hits are closely related taxa that might be hard to distinguish
35	Cry1-652	CRY1 heterotrophic lineage of cryptophytes	Eukaryota/Cryptophyceae_1/uncultured	TTTCACAGTWAACGATCCGCGC	30% (35°C)	23	very good	94.1	17	16	16	0	0		Probe targets a specific branch of uncultured Cryptophyceae (CRY-1)
36	CryptP1_680	CRY1 lineage of cryptophytes	Eukaryota/Cryptophyceae_1/uncultured	CACAGTAAACGATCCGCGCAA	40% (35°C)	21	very good	94.1	17	16	16	0	0		Probe targets a specific branch of uncultured Cryptophyceae (CRY-1)
37	Crypt 01-3	Cryptophytes clade 1, Cryptomonas	Eukayota/Cryptophyceae_1/Cryptomonas_1	TCATTACCCCAGTCCCAT	35% (35°C)/20% (46°C)	20,24	bad	42.6	54	23	23	0	0
38	Crypt 01–25	Cryptophytes clade 1, Cryptomonas	Eukayota/Cryptophyceae_1/Cryptomonas_1	CATTACCCCAGTCCCATAACCAACG	50% (35°C)	20, 21	bad	40.7	54	22	22	0	0		Probe Crypt01-25 is a longer version and targets the same sequences as Crypt 013
39	Crypt 02	Cryptophytes clade 2, Rhinomonas, Rhodomonas	Eukaryota/Cryptophyceae_1/Cryptomonadales_1/Rhodomonas	GTCCCACTACCCTACAGT	35% (35°C)/20% (46°C)	20,24	good	53.8	13	8	7	1	12.5	1 Eukaryota/Cryptophyceae_1/Cryptomonadales_1/Hemiselmis
40	Crypt 02-25	Cryptophytes clade 2, Rhinomonas, Rhodomonas	Eukaryota/Cryptophyceae_1/Cryptomonadales_1/Rhodomonas	GCGTCCCACTACCCTACAGTTAAGT	50% (35°C)	20, 21	good	53.8	13	8	7	1	12.5	1 Eukaryota/Cryptophyceae_1/Cryptomonadales_1/Hemiselmis	Probe Crypt02-25 is a longer version and targets the same sequences as Crypt 02
41	Crypt 03	Cryptophytes clade 3, Hanusia, Guillardia	Eukaryota/Cryptophyceae_1/Cryptomonadales_1/Guillardia	TTCCCGCGCACCACGGTT	35% (35°C)/20% (46°C)	20,24	good	100	3	4	3	1	25	1 Eukaryota/Cryptophyceae_1/Cryptomonadales_1/Hemiselmis
42	Crypt 03–25	Cryptophytes clade 3, Hanusia, Guillardia	Eukaryota/Cryptophyceae_1/Cryptomonadales_1/Guillardia	GTGTTCCCGCGCACCACGGTTAAAT	50% (35°C)	20, 21	good	100	3	4	3	1	25	1 Eukaryota/Cryptophyceae_1/Cryptomonadales_1/Hemiselmis	Probe Crypt03-25 is a longer version and targets the same sequences as Crypt 03
43	Crypt 04–25	Cryptophytes clade 4, Plagioselmis, Teleaulax, Geminigera	Eukaryota/Cryptophyceae_1/Cryptomonadales_1/Teleaulax, Eukaryota/Cryptophyceae_1/Cryptomonadales_1/Plagioselmis, Eukaryota/Cryptophyceae_1/Cryptomonadales_1/Geminigera, Eukaryota/Cryptophyceae_1/Cryptomonadales_1/uncultured	CACCTCCACCATAAAGGCATGAGGT	designed for microarrays	20	good	71.4	35	28	25	3	10.7	3 Eukaryota/Cryptophyceae_1/uncultured, 1 Cryptophyceae_1/Cryptomonadales_1/uncultured	Several taxa are targetd with this probe, we selected a monophyletic branch including these and some uncultivated lineages for probe evaluation. Some of the non-target hits might be part of target hits in a ML tree.
44	Crypt 07	Cryptophytes clade 7, Falcomonas	Eukayota/Cryptophyceae_1/Cryptomonanadales_1/Falcomonas daucoides	ACAAGGTCGGCTTGAATC	designed for microarrays	20	very good	100	1	1	1	0	0		Probe targets 1 sequence
45	Crypt 07–25	Cryptophytes clade 7, Falcomonas	Eukayota/Cryptophyceae_1/Cryptomonanadales_1/Falcomonas daucoides	CACCAAAACAAGGTCGGCTTGAATC	designed for microarrays	20	very good	100	1	1	1	0	0		Probe targets 1 sequence
46	Crypt 053	Cryptophytes clade 5, Proteomonas	Eukayota/Cryptophyceae_1/Cryptomonanadales_1/Proteomonas	GTCCCAACGCCCCTCAGT	designed for microarrays	20	good	50	2	1	1	0	0
47	Crypt 053–25	Cryptophytes clade 5, Proteomonas	Eukayota/Cryptophyceae_1/Cryptomonanadales_1/Proteomonas	TGCGTCCCAACGCCCCACAGTGAAG	50% (35°C)	20, 21	very good	100	1	1	1	0	0		Probe targets 1 sequence
48	Crypt 46	Cryptophytes clades 4 and 6, Komma, Chroomonas, Hemiselmis, Plagiomonas		CAAGGTCGGCTTTGCCTC	35% (35°C)/20% (46°C)	20,24	not evaluated			no hits in SILVA 138.1 Ref and RefNR
49	Kat1452	Katablepharidacea	Eukayota/Cryptophyceae/Kathablepharidae/uncultured	TTCCCGCARMATCGACGGCG	60% (35°C)	23	good	63.6	11	7	7	0	0		Probe targets a specific branch of Kathablepharidae
50	VR113	Katablepharis CRE (Columbia River Estuary)		GGAATTAGGCCAGCATCAGA	30% (46°C)	25	very good	100	1	1	1	0	0		Probe targets the LSU of katablepharids. As the LSU database contains only 1 katablepharid sequence in total, a judgement of coverage and specificity is difficult.
51	bodo1_988	environmental kinetoplastid clade	Eukaryota/Discoba/Discicristata/Euglenozoa/Kinetoplastea/Metakinetoplastina/Neobodonida/Neobodo	AACCGGACCGCGCCCCGC	20% (46°C)	8	bad	33.3	6	2	2	0	0		Probe was designed to target 1 sequence, a precise evaluation of target and non-target hits would require the computation of a ML tree. We selected a monophyletic branch in the guide tree of SILVA 138.1 for the current evaluation, therefore our overall rating is "bad" because of low coverage.
52	bodo1_1696	environmental kinetoplastid clade	Eukaryota/Discoba/Discicristata/Euglenozoa/Kinetoplastea/Metakinetoplastina/Neobodonida/Neobodo	AACCCACGAAAGGCAGCC	20% (46°C)	8	very good	100	1	1	1	0	0
53	bodo1_1294	environmental kinetoplastid clade	Eukaryota/Discoba/Discicristata/Euglenozoa/Kinetoplastea/Metakinetoplastina/Neobodonida/Neobodo	GCCCAACGCGUCGAAUG	20% (46°C)	8	very good	100	1	1	1	0	0
54	Pavlova01	Pavlovophyceae	Eukaryota/Haptophyta/Pavlovophyceae	CACCTCTCTCTACGGAAT	10% (50°C), 40% (35°C)	26, 27	very good	84.2	38	32	32	0	0
55	Phaeo02	Phaeocystis spp	Eukaryota/Haptophyta/Prymnesiophyceae/Phaeocystis	TCGGCAGACCGCTCGGCCCG	50% (35°C)	28, 27	good	71.4	14	10	10	0	0
56	PHAEO03	Phaeocystis globosa, P. pouchetii, P. antarctica, and P. cordata	Eukaryota/Haptophyta/Prymnesiophyceae/Phaeocystis	GAGTAGCCGCGGTCTCCGGAAAGAAGGCCGCGCC	not given	28	very good	100	8	8	8	0	0		Probe targets a specific branch of Phaeocystis
57	PHAEO01	Phaeocystis	Eukaryota/Haptophyta/Prymnesiophyceae/Phaeocystis	CGGTCGAGGTGGACTCGT	10% (46°C)	11	good	75	8	6	6	0	0		Probe targets a specific branch of Phaeocystis
58	PHAEO04	Phaeocystis spp	Eukaryota/Haptophyta/Prymnesiophyceae/Phaeocystis	GACTAGAAGTAGCCCTGT	not given	28	good	85.7	14	14	12	2	14.3	2 Eukaryota/Haptophyta/Prymnesiophyceae/SGUH624	Non-target hits are closely related to target group, possibility of different placing in ML tree - might be within target group
59	ChrysB2-Clade02	Chrysochromulina	Eukaryota/Haptophyta/Prymnesiophyceae/Prymnesiales/Chrysochromulina and related uncultured lineages	AGTCGGGTCTTCCTGCATGT	40% (46°C)	12	good	81.5	65	54	53	1	1.9	1 Eukaryota/Haptophyta/Prymnesiophyceae/Prymnesiales/OLI51059	Chrysochromulina has several lineages in SILVA 138.1. A monophyletic higher-class level including all lineages of Chrysochromulina, OLI16029, AI5F14RJ2A07 and several uncultured clades was used for an evaluation of the probe. Non-target hit is closely related to target group, possibility of different placing in an ML tree (might be within target group)
	ChrysB2-Clade02 competitor	competitor for probe ChrysB2-Clade02	no Eukaryota/Haptophyta/Prymnesiophyceae/Prymnesiales/Chrysochromulina and related uncultured lineages	AGTCGGGACTTCCTGCATGT	40% (46°C)	12	very good	0	65	29	0
60	PrymB1-Clade01	Chrysochromulina (Prymnesium)	Eukaryota/Haptophyta/Prymnesiophyceae/Prymnesiales/Prymnesium	GGACTTCCGCCGATCCCTAGT	50% (46°C)	12	good	61.1	18	11	11	0	0		Several Chrysochromulina spp. were reclassified as Prymnesium
61	CPOLY01	Chrysochromulina (Prymnesium) polylepis	Eukaryota/Haptophyta/Prymnesiophyceae/Prymnesiales/Prymnesium/Prymnesium polylepis	GACTATAGTTTCCCATAAGGT	10% (46°C)	12	very good	100	1	1	1	0	0		Chrysochromulina polylepis was reclassified as Prymnesium polylepis
62	Haptol640	Haptolina	Eukaryota/Haptophyta/Prymnesiophyceae/Prymnesiales/Haptolina	GGCAGACCGGCAGGCAGGCCC	60% (35°C)	29	very good	100	4	4	4	0	0		Although H. brevifila seems to be a non-target hit in SILVA 138.1 NR, it was in the target lineage in the published RAxML tree
63	glsc407	Glaucoma scintillans	Eukaryota/SAR/Alveolata/Ciliophora/Intramacronucleata/Conthreep/Oligohymenophorea/Hymenostomatia/Glaucoma/Glaucoma scintillans	ACTAAGTCTCCCGGTCTG	30% (46°C)	30	very good	100	1	1	1	0	0
64	glsc413	Glaucoma scintillans	Eukaryota/SAR/Alveolata/Ciliophora/Intramacronucleata/Conthreep/Oligohymenophorea/Hymenostomatia/Glaucoma/Glaucoma scintillans	GTAGAGACTAAGTCTCCC	10% (46°C)	30	very good	100	1	1	1	0	0
65	glsc651	Glaucoma scintillans	Eukaryota/SAR/Alveolata/Ciliophora/Intramacronucleata/Conthreep/Oligohymenophorea/Hymenostomatia/Glaucoma/Glaucoma scintillans	AGTCGCACCAGTAAAGGC	20% (46°C)	30	bad	100	1	3	1	2	66.7	1 Eukaryota/SAR/Alveolata/Ciliophora/Intramacronucleata/Conthreep/Oligohymenophorea/Hymenostomatia/Bromeliophrya, 1 Eukaryota/SAR/Alveolata/Ciliophora/Intramacronucleata/Conthreep/Oligohymenophorea/Peniculia/Stokesia	Probe has 2 non-target hits with other ciliates
66	glsc1129	Glaucoma scintillans	Eukaryota/SAR/Alveolata/Ciliophora/Intramacronucleata/Conthreep/Oligohymenophorea/Hymenostomatia/Glaucoma/Glaucoma scintillans	CACCGTTGTTCACAATGC	20% (46°C)	30	very good	100	1	1	1	0	0
67	Pspe210	Pseudocohnilembus persalinus	Eukaryota/SAR/Alveolata/Ciliophora/Intramacronucleata/Conthreep/Oligohymenophorea/Scuticociliatia/Pseudocohnilembus	ATGATTTATCCCAGAGGG	20% (46°C)	31	very good	100	1	1	1	0	0
68	SWARM 14	Ciliate- Strombidium (undescribed species)	Eukaryota/SAR/Alveolata/Ciliophora/Intramacronucleata/Spirotrichea/Oligotrichia/Strombidium	TAACAGAAGGATGAAAGGGC	35% (46°C)	32	bad	100	1	7	1	6	85.7	1 Eukaryota/SAR/Alveolata/Ciliophora/Intramacronucleata/Spirotrichea/Hypotrichia/Hemigastrostyla, 1 Eukaryota/SAR/Alveolata/Ciliophora/Intramacronucleata/Spirotrichea/Hypotrichia/Ponturostyla, 1 Eukaryota/SAR/Alveolata/Ciliophora/Intramacronucleata/Spirotrichea/Hypotrichia/Urosoma, 1 Eukaryota/SAR/Alveolata/Ciliophora/Intramacronucleata/Spirotrichea, 2 Eukaryota/SAR/Alveolata/Ciliophora/Intramacr…	Probe was designed to target 1 sequence, probe in original paper was in reverse-complement. Too many non-target hits.
69	ATAM01	Alexandrium tamarense	Eukaryota/SAR/Alveolata/Dinoflagellata/Dinophyceae/Peridiniphycidae/Gonyaulacales/Alexandrium	TTCAAGGCCAAACACCTG	20% (55°C)	13	good	83.9	31	26	26	0	0		Probe targets a specific branch of Alexandrium spp. incl. A. tamarense, A. fundyense, A. catenella, A. cohorticula, A. affine
70	AOST02	Alexandrium ostenfeldii	Eukaryota/SAR/Alveolata/Dinoflagellata/Dinophyceae/Peridiniphycidae/Gonyaulacales/Alexandrium/Alexandrium andersonii	CACCAAGGTTCCAAGCAG	20% (55°C)	13	very good	100	1	1	1	0	0		Probe targets 1 sequence (A. andersonii, not A. ostenfeldii)
71	PERKIN_01	Perkinsozoa - A31	Eukaryota/SAR/Alveolata/Protalveolata/Perkinsidae/A31	GAGGATGCCTCGGTCAA	40% (35°C)	16	bad	19.5	41	9	8	1	11.1	1 Eukaryota/Amorphea/Obazoa/Opistokonta/Nucleomycea/Fungi/Cryptomycota	Low coverage
72	PERKIN_02	Perkinsozoa	Eukaryota/SAR/Alveolata/Protalveolata/Perkinsidae/A31	GCCAAACATTGTACTGCG	40% (35°C)	16	bad	2.4	41	1	1	0	0		Low coverage
73	Alv_Bal01	Subcluster of Syndiniales	Eukaryota/SAR/Alveolata/Protalveolata/Syndiniales/Syndiniales Group I	AAGTGCAATACGCTCCCCTT	50% (35°C)	4	very good	87.5	8	8	7	1	12.5	1 other Eukaryota/SAR/Alveolata/Protalveolata/Syndiniales/Syndiniales Group I	Probe targets a specific branch in Syndiniales Group I in the published RAxML tree, a precise evaluation of the probe is not possible without computating of a new tree. We selected a monophyletic branch in the guide tree of SILVA 138.1 for the current evaluation.
74	Alv_Bal02	Subcluster of Syndiniales	Eukaryota/SAR/Alveolata/Protalveolata/Syndiniales/Syndiniales Group I	GAAACCCGGGTTGGTTCAGT	55% (35°C)	4	good	62.2	74	47	46	1	2.1	1 other Eukaryota/SAR/Alveolata/Protalveolata/Syndiniales/Syndiniales Group I	Probe targets a specific branch in Syndiniales Group I in the published RAxML tree, a precise evaluation of the probe is not possible without computating of a new tree. We selected a monophyletic branch in the guide tree of SILVA 138.1 for the current evaluation.
75	CRN02	Minorisa minuta	Eukaryota/SAR/Rhizaria/Cercozoa/Chlorarachniophyta/Minorisa	TACTTAGCTCTCAGAACC	30% (35°C)	33	very good	100	2	2	2	0	0		Probe was desiged to target a all sequences of Minorisa spp. in the published RAxML tree; we selected a clearly separated branch within Minorisa spp. in the SILVA 138.1 guide tree for evaluation, the coverage of all Minorisa spp. sequences would be 33.3%.
76	Cerc_Bal02A	Cercozoa Novel Clade 2	Eukaryota/SAR/Rhizaria/Cercozoa/Novel Clade 2	AGAACCCGTAGTCCTATA	30% (35°C)	34	very good	93.3	15	14	14	0	0		Probes Cerc_Bal02A & Cerc_Bal02B should be used combined, they target a specific branch of Cercozoa Novel Clade 2. Our evaluation is based on the sum of hits for both probes
77	Cerc_Bal02B	Cercozoa Novel Clade 2	Eukaryota/SAR/Rhizaria/Cercozoa/Novel Clade 2	TTCGACGTATAAGGGTGC	30% (35°C)	34	very good	93.3	15	14	14	0	0		Probes Cerc_Bal02A & Cerc_Bal02B should be used combined, they target a specific branch of Cercozoa Novel Clade 2. Our evaluation is based on the sum of hits for both probes
78	Cerc_Bal01	Cercozoan subcluster	Eukaryota/SAR/Rhizaria/Cercozoa/Thecofilosea/Ebriacea/Ebria	AGTAAAAGATCTAACTCGCC	35% (35°C)	4	very good	100	2	2	2	0	0		Probe targets a small lineage of Cercozoa/Ebria according to a RAxML tree in Piwosz et al. 2011. The genus Ebria contains now 21 sequences in SILVA database 138.1
79	Cerc-193	Cercozoa Novel clade 7	Eukaryota/SAR/Rhizaria/Cercozoa/uncultured (Novel Clade 7)	CAAGCACCGTTGCCGGATTGG	55% (35°C)	35	good	50	2	1	1	0	0
	Cerc-193-C	Competitor probe for Cerc-193	no Eukaryota/SAR/Rhizaria/Cercozoa/uncultured (Novel Clade 7)	CAAGGACCGTTGCCGGATTGG	55% (35°C)	35	very good	0	2	0	0
80	CET01	Caecitellus parvulus and C. paraparvulus	Eukaryota/SAR/Stramenopiles/Bicosoecida/Caecitellus	CAGCTCAATACGGACACC	30% (46°C)	36	very good	80	10	8	8	0	0
81	CAF01	Cafeteria roenbergensis (including Cafeteria mylnikovii)	Eukaryota/SAR/Stramenopiles/Bicosoecida/Cafeteria	ACAGTGCTGACACCCTGT	30% (46°C)	36	good	62.5	8	5	5	0	0
82	NS1A	MAST 1A clade	Eukaryota/SAR/Stramenopiles/MAST-1A	ATTACCTCGATCCGCAAA	30% (46°C)	37	good	75	8	6	6	0	0
83	NS1B	MAST 1B clade	Eukaryota/SAR/Stramenopiles/MAST-1B	AACGCAAGTCTCCCCGCG	30% (46°C)	37	very good	100	4	4	4	0	0
84	NS1C	MAST 1C clade	Eukaryota/SAR/Stramenopiles/MAST-1C	GTGTTCCCTAACCCCGAC	30% (46°C)	37	bad	66.7	12	11	8	3	27.3	1 Eukaryota/SAR/Stramenopiles/MAST-3J, 1 Eukaryota/SAR/Stramenopiles, 1 Eukaryota/SAR/Stramenopiles/uncultured	Some non-target hits with other Stramenophiles incl. another MAST group
85	NS2	MAST-2 clade	Eukaryota/SAR/Stramenopiles/MAST-2	CGGGTCCCGAGCACGACA	30% (46°C)	37	good	50	6	3	3	0	0
86	NS3	MAST 3 clade	Eukaryota/SAR/Stramenopiles/MAST-3	ATTACCTTGGCCTCCAAC	30% (46°C)	38	good	58.6	128	77	75	2	2.6	1 SAR/Alveolata/Dinoflagellata/Dinophyceae/Peridiniphycidae/Peridiniales/Peridinium, 1 Amorphea/Obazoa/Opisthokonta/Holozoa/Choanozoa/Metazoa/Porifera
87	NS4	MAST 4 clade	Eukaryota/SAR/Stramenopiles/MAST-4	TACTTCGGTCTGCAAACC	30% (46°C)	38	good	78.6	28	24	22	2	8.3	2 Eukaryota/Cryptophyceae/uncultured
88	MAST-6	MAST-6 clade	Eukaryota/SAR/Stramenopiles/MAST-6	CCAAAGCAGTTGGGAGTTAAC	35% (35°C)	4	bad	40	5	2	2	0	0
89	NS7	MAST-7	Eukaryota/SAR/Stramenopiles/MAST-7	TCATTACCATAGTACGCA	40% (35°C)	39	very good	81.5	27	25	22	3	12	2 Eukaryota/SAR/Stramenopiles/Labyrinthulomycetes/uncultured, 1 Eukaryota/SAR/Stramenopiles/MAST-3	3 non-target hits within Labyrinthulomycetes can be easily recognized by a different shape and parasitic lifestyle
90	MAST-12Nor2	MAST12-C	Eukaryota/SAR/Stramenopiles/MAST-12C	UACAGUGCCAAUGGAGAC	10-20% (46°C)	40	very good	81.8	11	10	9	1	10	1 Eukaryota/Amorphea/Obazoa/Opisthokonta/Nucletmycea/Aphelidea/Paraphelidium	1 non-target hit is a parasitic chytrid that can be microscopically recognized by experts
	Bolido01 (S-Sc-Boli-1591(P. globosa)-a-A-18)	Bolidophyceae/Parmales	Eukaryota/SAR/Stramenopiles/Ochrophyta/Bolidomonas	CAGTCTGATGAACTGCGT	designed for dot blot hybridzation	41	bad	56.25	25	16	9	7	43.8	1 Eukaryota/SAR/Stramenopiles/Ochrophyta/Chrysophyceae/uncultured, 11 Eukaryota/SAR/Stramenopiles/MAST-12, 3 Eukaryota/SAR/Stramenopiles/Bicosoecida	Too many non-target hits
91	Bolido02 (S-Sc-Boli-582(P. globosa)-a-A-18)	Bolidophyceae/Parmales	Eukaryota/SAR/Stramenopiles/Ochrophyta/Bolidomonas	TACCTAGGTACGCAAACC	40% (35°C)	41, 42	good	60	25	16	15	1	6.3	1 Eukaryota/SAR/Stramenopiles/Ochrophyta/Diatomea/ME-Euk-FW10
92	Pbiv 1537	P. bandaiensis, P. imperforata, P. vestita species group	Eukaryota/SAR/Stramenopiles/Ochrophyta/Chrysophyceae/Ochromonadales/Paraphysomonas	CAAGATTCAGAATTGCAAAAA	0% (40°C)	43	good	78.9	57	46	45	1	2.2	1 Eukaryota/SAR/Stramenopiles/Ochrophyta/Chrysophyceae/uncultured	Paraphysomonas is polyphyletic, P. vestita is in a different branch, the 1 non-target hit might be also another branch of Paraphysomonas
93	Pband 635	Paraphysomonas bandaiensis	Eukaryota/SAR/Stramenopiles/Ochrophyta/Chrysophyceae/Ochromonadales/Paraphysomonas/Paraphysomonas bandaiensis	TGAGGGATGGACCGGTTGCC	0% (40°C)	43	bad	100	1	2	1	1	50	1 Eukaryota/SAR/Stramenopiles/Ochrophyta/Chrysophyceae/Synurales/Mallomonas	Probe has an non-target hit - we suggest to use one of the other probes (Pband 663, Pband 1683 or Pband 706) that are more specific
94	Pband 663	Paraphysomonas bandaiensis	Eukaryota/SAR/Stramenopiles/Ochrophyta/Chrysophyceae/Ochromonadales/Paraphysomonas/Paraphysomonas bandaiensis	GGCCGCAGAAACCTGGTACACA	0% (40°C)	43	very good	100	1	1	1	0	0
95	Pband 1683	Paraphysomonas bandaiensis	Eukaryota/SAR/Stramenopiles/Ochrophyta/Chrysophyceae/Ochromonadales/Paraphysomonas/Paraphysomonas bandaiensis	CCGATCCGCGGTCCGAAA	0% (40°C)	43	very good	100	1	1	1	0	0
96	Pband 706	Paraphysomonas bandaiensis	Eukaryota/SAR/Stramenopiles/Ochrophyta/Chrysophyceae/Ochromonadales/Paraphysomonas/Paraphysomonas bandaiensis	CCCACACCAGACAACTCAAT	0% (40°C)	43	very good	100	1	1	1	0	0
97	Pimp 635	Paraphysomonas imperforata	Eukaryota/SAR/Stramenopiles/Ochrophyta/Chrysophyceae/Ochromonadales/Paraphysomonas/Paraphysomonas imperforata	TGAGGGGCGGACCGGTCGCC	0% (40°C)	43, 44	very good	100	1	2	1	1	50	1 other Eukaryota/SAR/Stramenopiles/Ochrophyta/Chrysophyceae/Ochromonadales/Paraphysomonas	Probe was designed to target 1 sequence, a precise evaluation of 1 closely related non-target hit would require the computation of a ML tree.
98	Pimp 663	Paraphysomonas imperforata	Eukaryota/SAR/Stramenopiles/Ochrophyta/Chrysophyceae/Ochromonadales/Paraphysomonas/Paraphysomonas imperforata	GGACGCAGAGACCAGGTGCACA	0% (40°C)	43, 44	good	100	1	3	1	2	66.7	2 other Eukaryota/SAR/Stramenopiles/Ochrophyta/Chrysophyceae/Ochromonadales/Paraphysomonas	Probe was designed to target 1 sequence, a precise evaluation of target and non-target hits would require the computation of a ML tree. All non-target hits are in the same lineage.
99	Pimp 1683	Paraphysomonas imperforata	Eukaryota/SAR/Stramenopiles/Ochrophyta/Chrysophyceae/Ochromonadales/Paraphysomonas/Paraphysomonas imperforata	CCAAGCCGCAGTCCGAGA	0% (40°C)	43, 44	good	100	1	7	1	6	85.7	7 other Eukaryota/SAR/Stramenopiles/Ochrophyta/Chrysophyceae/Ochromonadales/Paraphysomonas	Probe was designed to target 1 sequence, a precise evaluation of target and non-target hits would require the computation of a ML tree. All non-target hits are in the same lineage.
100	PI 1	Paraphysomonas imperforata	Eukaryota/SAR/Stramenopiles/Ochrophyta/Chrysophyceae/Ochromonadales/Paraphysomonas/Paraphysomonas imperforata	GGACCGGTCGCCACG	0-10% (45°C)	5	very good	100	1	2	1	1	50	1 other Eukaryota/SAR/Stramenopiles/Ochrophyta/Chrysophyceae/Ochromonadales/Paraphysomonas	Probe was designed to target 1 sequence, a precise evaluation of 1 closely related non-target hit would require the computation of a ML tree.
101	PI 2	Paraphysomonas imperforata	Eukaryota/SAR/Stramenopiles/Ochrophyta/Chrysophyceae/Ochromonadales/Paraphysomonas/Paraphysomonas imperforata	AACTGAATGCCAGACGC	0-10% (45°C)	5	bad	100	1	4	1	3	75	1 Eukaryota/SAR/Stramenopiles/Ochrophyta/Chrysophyceae/uncultured, 2 other Eukaryota/SAR/Stramenopiles/Ochrophyta/Chrysophyceae/Ochromonadales/Paraphysomonas	Probe was designed to target 1 sequence, a precise evaluation of 3 closely related non-target hits would require the computation of a ML tree.
102	PV1	Paraphysomonas vestita	Eukaryota/SAR/Stramenopiles/Ochrophyta/Chrysophyceae/Ochromonadales/Paraphysomonas/Paraphysomonas vestita	TAAAACCCATCCTATTATATC	0-10% (45°C)	5	very good	100	2	2	2	0	0		Probe was designed to target 1 sequence, a precise evaluation of target and non-target hits would require the computation of a ML tree. We selected a monophyletic branch in the guide tree of SILVA 138.1 for the current evaluation.
103	PV2	Paraphysomonas vestita	Eukaryota/SAR/Stramenopiles/Ochrophyta/Chrysophyceae/Ochromonadales/Paraphysomonas/Paraphysomonas vestita	TTCCGTATGCCAGTCAGA	0-10% (45°C)	5	very good	100	1	1	1	0	0
104	PV3	Paraphysomonas vestita	Eukaryota/SAR/Stramenopiles/Ochrophyta/Chrysophyceae/Ochromonadales/Paraphysomonas/Paraphysomonas vestita	AGTATAAATATCACAGTCCGA	0-10% (45°C)	5	very good	100	1	1	1	0	0
105	PV4	Paraphysomonas vestita	Eukaryota/SAR/Stramenopiles/Ochrophyta/Chrysophyceae/Ochromonadales/Paraphysomonas	ATATAATCTTTTCGATGATGA	0-10% (45°C)	5	good	66.7	9	6	6	0	0		Probe was designed to target 1 sequence, a precise evaluation of target and non-target hits would require the computation of a ML tree. We selected a monophyletic branch in the guide tree of SILVA 138.1 for the current evaluation.
106	PV5	Paraphysomonas vestita	Eukaryota/SAR/Stramenopiles/Ochrophyta/Chrysophyceae/Ochromonadales/Paraphysomonas	CCCATCCTATTATATCAGAAA	0-10% (45°C)	5	very good	100	2	2	2	0	0		Probe was designed to target 1 sequence, a precise evaluation of target and non-target hits would require the computation of a ML tree. We selected a monophyletic branch in the guide tree of SILVA 138.1 for the current evaluation.
107	Ped675	Pedinellales	Eukaryota/SAR/Stramenopiles/Ochrophyta/Dictyochophyceae/Pedinellales	TCACAGTAAACGACAGGCGT	45% (35°C)	4	good	78.6	28	24	22	2	8.3	1 Eukaryota/SAR/Stramenopiles/Ochrophyta/Diatomea/Bacillariophytina/Mediophyceae/Thalassiosira, 1 Eukaryota/SAR/Alveolata/Ciliophora/Intramacronucleata/Spirotrichea/Oxytrichidae
108	Aperad631	Apedinella radians	Eukaryota/SAR/Stramenopiles/Ochrophyta/Dictyochophyceae/Pedinellales	CCAGCATGAGTCCCCCTGAGG	45% (46°C)	29	very good	100	1	1	1	0	0
109	Pseela1352	Pseudopedinella elastica	Eukaryota/SAR/Stramenopiles/Ochrophyta/Dictyochophyceae/Pedinellales	GCGAAGCATTCCCAGCACTAT	30% (46°C)	29	very good	100	2	2	2	0	0
110	PED1646	Pedinellales/Rhizochromulinales	Eukaryota/SAR/Stramenopiles/Ochrophyta/Dictyochophyceae/Pedinellales and Eukaryota/SAR/Stramenopiles/Ochrophyta/Dictyochophyceae/Rhizochromulinales/Rhizochromulina	TTACCTTCGATCGGTAGG	20% (35°C)	45	good	75	36	32	27	5	15.6	1 Eukaryota/SAR/Alveolata/Protalveolata/Syndiniales/Syndiniales Group II, 1 Eukaryota/SAR/Stramenopiles/Ochrophyta/Chrysophyceae/uncultured, 3 Eukaryota/SAR/Stramenopiles/Ochrophyta/Diatomea/Bacillariophytina/Mediophyceae/Thalassiosira
111	PELA01	Pelagophytes	Eukaryota/SAR/Stramenopiles/Ochrophyta/Pelagophyceae	ACGTCCTTGTTCGACGCT	0% (46°C)	12	very good	89.5	38	34	34	0	0
112	PELA02	Pelagophyceae	Eukaryota/SAR/Stramenopiles/Ochrophyta/Pelagophyceae	GCAACAATCAATCCCAATC	40% (35°C)	12	bad	36.8	38	19	14	5	26.3	2 Eukaryota/SAR/Alveolata/Protalveolata/Syndiniales/Syndiniales Group I, 1 Eukaryota/SAR/Alveolata/Protalveolata/Syndiniales/Syndiniales Group II, 1 Eukaryota/SAR/Stramenopiles/Labyrinthulomycetes/uncultured, 1 Eukaryota/SAR/Stramenopiles/Ochrophyta/Diatomea/Bacillariophytina/Mediophyceae/Thalassiosira	High number of non-target hits
Probes targeting chloroplasts
113	PELA1035	Pelagophytes	Bacteria/Cyanobacteria/Cyanobacteriia/Chloroplast	ACCACCTGTGTGTGTCTA	designed for dot blot hybridzation	46	good	61	59	36	36	0	0		Probe targets chloroplast 16S rRNA; specificy is difficult to evaluate and was based on clearly separated monophyletic branches in SILVA 138.1
114	CHLA768	Chlorarachniophyceae	Bacteria/Cyanobacteria/Cyanobacteriia/Chloroplast	CCATTCTCTCCCCTCGCT	designed for dot blot hybridzation	46	very good	100	8	8	8	0	0		Probe targets chloroplast 16S rRNA; specificy is difficult to evaluate and was based on clearly separated monophyletic branches in SILVA 138.1
115	CHRY1037	Chrysophyceae	Bacteria/Cyanobacteria/Cyanobacteriia/Chloroplast	GCACCACCTGTGTAAGAG	20% (35°C)	46, 29	very good	85.1	74	63	63	0	0		Probe targets chloroplast 16S rRNA; specificy is difficult to evaluate and was based on clearly separated monophyletic branches in SILVA 138.1
116	CRYP862	Cryptophyceae	Bacteria/Cyanobacteria/Cyanobacteriia/Chloroplast	GGATACTTAACGCCTTAG	designed for dot blot hybridzation	46	very good	93.5	92	86	86	0	0		Probe targets chloroplast 16S rRNA; specificy is difficult to evaluate and was based on clearly separated monophyletic branches in SILVA 138.1
117	EUST985	Eustigmatophyceae	Bacteria/Cyanobacteria/Cyanobacteriia/Chloroplast	CACTTCTAGCAAACCCTG	designed for dot blot hybridzation	46	very good	86.2	94	81	81	0	0		Probe targets chloroplast 16S rRNA; specificy is difficult to evaluate and was based on clearly separated monophyletic branches in SILVA 138.1
118	PAVL665	Pavlovophyceae	Bacteria/Cyanobacteria/Cyanobacteriia/Chloroplast	TAGAAATTCCTCCTACCC	designed for dot blot hybridzation	46	very good	100	4	4	4	0	0		Probe targets chloroplast 16S rRNA; specificy is difficult to evaluate and was based on clearly separated monophyletic branches in SILVA 138.1
119	PELA1035	Pelagophyceae	Bacteria/Cyanobacteria/Cyanobacteriia/Chloroplast	ACCACCTGTGTGTGTCTA	designed for dot blot hybridzation	46	good	55.7	61	36	34	2	5.6	2 other Bacteria/Cyanobacteria/Cyanobacteriia/Chloroplast	Probe targets chloroplast 16S rRNA; specificy is difficult to evaluate and was based on clearly separated monophyletic branches in SILVA 138.1
120	PING1024	Pinguiophyceae	Bacteria/Cyanobacteria/Cyanobacteriia/Chloroplast	ACGTATTCCTTACGGCAC	designed for dot blot hybridzation	46	very good	100	3	3	3	0	0		Probe targets chloroplast 16S rRNA; specificy is difficult to evaluate and was based on clearly separated monophyletic branches in SILVA 138.1
121	PRAS826	Prasinophyceae clade VI	Bacteria/Cyanobacteria/Cyanobacteriia/Chloroplast	GATTCGCGTATCCCCTAG	designed for dot blot hybridzation	46	bad	33.3	3	1	1	0	0		Probe targets chloroplast 16S rRNA; specificy is difficult to evaluate and was based on clearly separated monophyletic branches in SILVA 138.1
122	PRYM666	Prymnesiophyceae	Bacteria/Cyanobacteria/Cyanobacteriia/Chloroplast	CTAGAAATTCCCTCTACC	designed for dot blot hybridzation	46	very good	86.4	418	368	361	7	1.9	7 other Bacteria/Cyanobacteria/Cyanobacteriia/Chloroplast	Probe targets chloroplast 16S rRNA; specificy is difficult to evaluate and was based on clearly separated monophyletic branches in SILVA 138.1
123	TREB708	Trebouxiophyceae (CCMP243, RCC9, and Prototheca clusters)	Bacteria/Cyanobacteria/Cyanobacteriia/Chloroplast	CCTTTGGTGTTCCTCCCG	designed for dot blot hybridzation	46	good	52.4	63	53	33	20	37.7	20 diverse Bacteria	Probe targets chloroplast 16S rRNA; specificy is difficult to evaluate and was based on clearly separated monophyletic branches in SILVA 138.1
